# Supplementary material
Source: Springer Nature journal article supplement (https://www.springermedizin.de/resource/supplementary/12885_2012_3868_MOESM2_ESM.pdf/9464654)

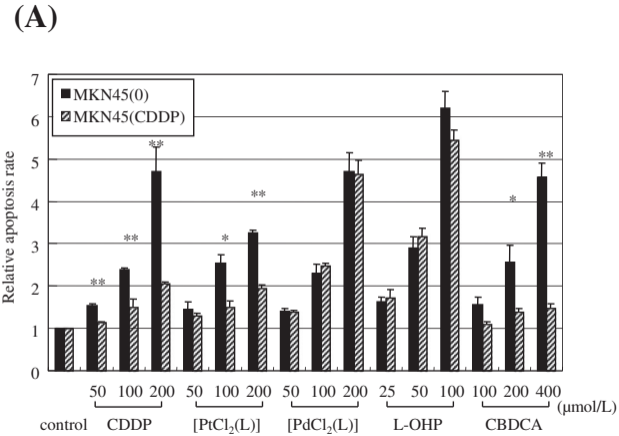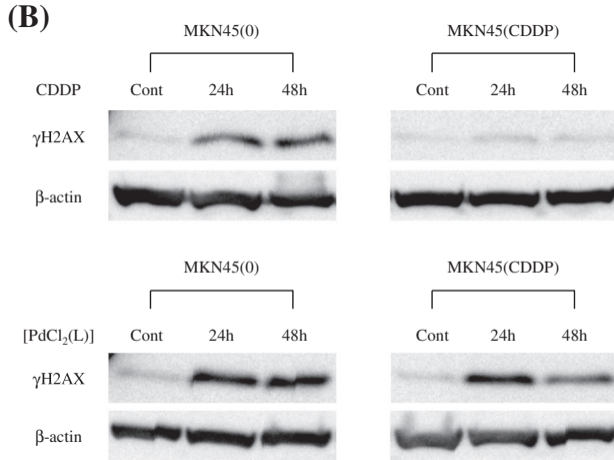

Supplement: MOESM2 [file 9464654]
